# Supplementary material for: CD123 expression patterns and selective targeting with a CD123-targeted antibody-drug conjugate (IMGN632) in acute lymphoblastic leukemia
Source: PubMed Central journal article supplement — Haematologica. 2018 Oct 25;104(4):749–55. doi: 10.3324/haematol.2018.205252 (PMC6442980; doi:10.3324/haematol.2018.205252), 2019-04
Supplement: 2018_205252-Disclosures_and_Contributions.pdf [file 2018_205252-Disclosures_and_Contributions.pdf]

Haematologica  
HAEMATOL/2018/205252  
Version 3

CD123 expression patterns and selective targeting with a  
CD123-specific antibody-drug conjugate (IMGN632) in acute  
lymphoblastic leukemia

Evgeniya Angelova, Charlene Audette, Yelena Kovtun, Naval Daver,  
Sa A. Wang, Sherry Pierce, Sergej N. Konoplev, Haitham Khogeer,  
Jeffrey L. Jorgensen, Marina Konopleva, Patrick A. Zweidler-McKay, L.  
Jeffrey Medeiros, Hagop M. Kantarjian, Elias J. Jabbour, and Joseph  
D. Khoury

Disclosures: CA, YK and PZM are current or former employees of ImmunoGen, Inc. All other authors declare no potential conflicts of interest.

Contributions: Concept, study development, and manuscript original draft: JDK, EA, YK; Experimental studies and data analysis: EA, CA, YK, MYK, JDK; Resources: ND, SAW, SAP, SK, HK, JLJ, MYK, PZM, LJM, HK, EJJ. All authors contributed to the final version of the manuscript.
